# Supplementary material for: Portrait of Molecular Signaling and Putative Therapeutic Targets in Prostate Cancer with ETV4 Fusion
Source: MDPI journal article supplement (doi:10.3390/biomedicines10102650), 2022-10-20
Supplement: s1 [file s1]

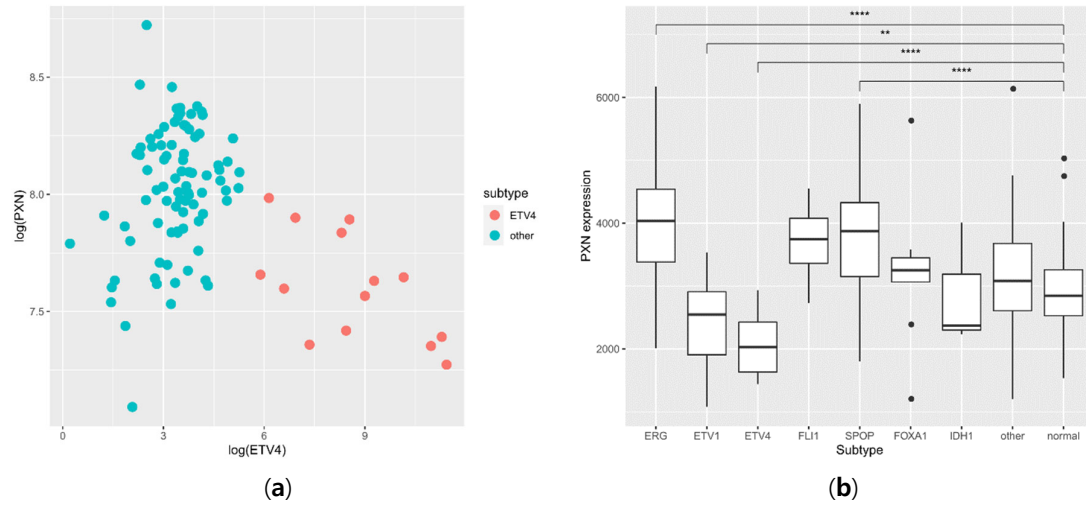

**Figure S1.** Pattern of PXN expression in prostate cancer: **(a)** Dot plot of PXN expression and ETV4 expression. The x-axis is the log value of ETV4 expression level and the y-axis is the log value of PXN expression; **(b)** Box plot of PXN expression in prostate cancer according to subtype. Classification of each subtype was based on a prior study and normal group samples were from the TCGA database with the sample code 11. \*\* $p \leq 0.01$  \*\*\*\* $p \leq 0.0001$ .

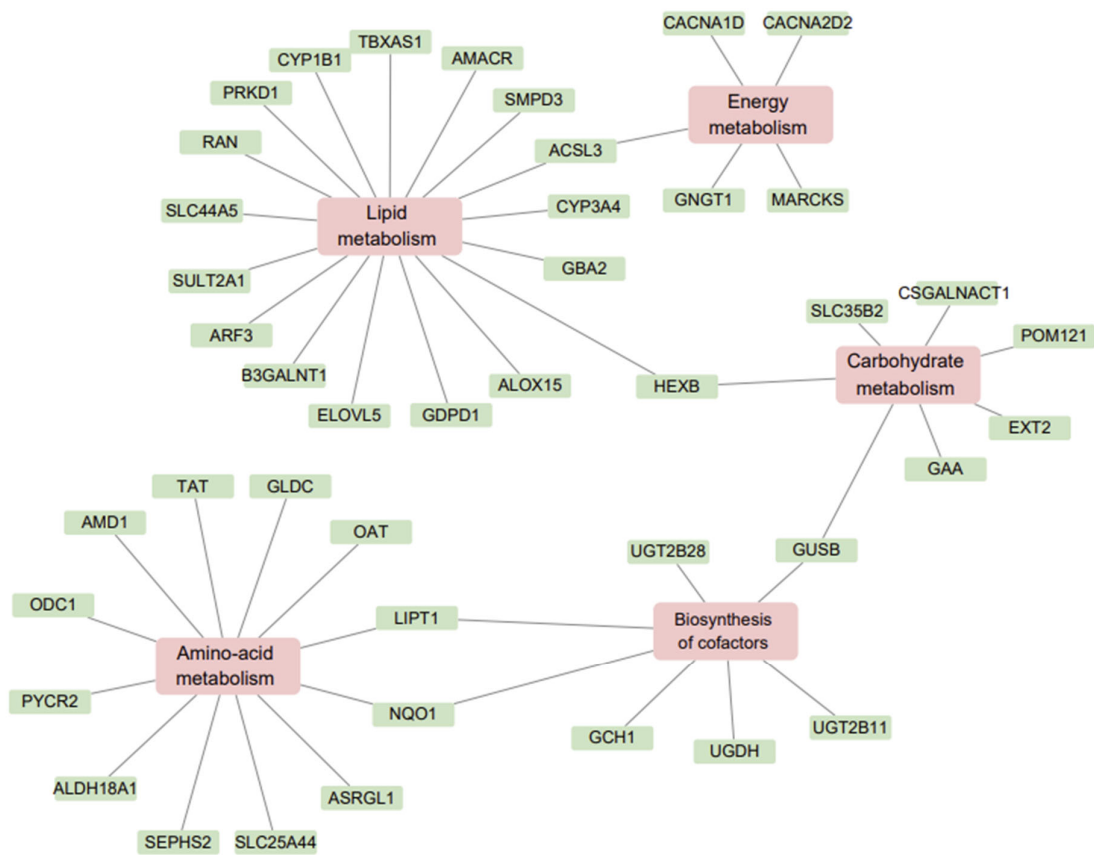

**Figure S2.** Gene-pathway network about metabolism pathway. Red round rectangles are major pathways related to metabolism. Green round rectangles are genes.
